# Supplementary material for: The Ser290Asn and Thr715Pro Polymorphisms of the SELP Gene Are Associated with A Lower Risk of Developing Acute Coronary Syndrome and Low Soluble P-Selectin Levels in A Mexican Population
Source: MDPI journal article supplement (doi:10.3390/biom10020270), 2020-02-11
Supplement: s1 [file s1]

Supplementary Table S1. Distribution of Ser290Asn and Thr715Pro *SEL-P* polymorphisms in individuals with and without T2DM.

| n (genotype frequencies)       |                   |                  |                 | MAF  | Model         | OR (95%CI)       | pC   |
|--------------------------------|-------------------|------------------|-----------------|------|---------------|------------------|------|
| SELP G1057A Ser290Asn (rs6131) |                   |                  |                 |      |               |                  |      |
| With T2DM (n=281)              | GG<br>243 (0.865) | GA<br>37 (0.132) | AA<br>1 (0.004) | 0.07 | Co-dominant   | 0.98 (0.66-1.46) | 0.74 |
|                                |                   |                  |                 |      | Dominant      | 0.96 (0.65-1.42) | 0.83 |
|                                |                   |                  |                 |      | Recessive     | 0.96 (0.06-3.84) | 0.44 |
| Without T2DM (n=1028)          | 867 (0.843)       | 152 (0.148)      | 9 (0.009)       | 0.08 | Over-dominant | 0.99 (0.67-1.47) | 0.96 |
|                                |                   |                  |                 |      | Additive      | 0.93 (0.65-1.35) | 0.72 |
| SELP A2331C Thr715Pro (rs6136) |                   |                  |                 |      |               |                  |      |
| With T2DM (n=274)              | AA<br>233 (0.850) | AC<br>38 (0.139) | CC<br>3 (0.011) | 0.08 | Co-dominant   | 1.74 (0.78-1.76) | 0.57 |
|                                |                   |                  |                 |      | Dominant      | 1.20 (0.81-1.78) | 0.36 |
|                                |                   |                  |                 |      | Recessive     | 1.70 (0.43-6.39) | 0.47 |
| Without T2DM (n=1019)          | 885 (0.868)       | 126 (0.124)      | 8 (0.008)       | 0.07 | Over-dominant | 1.17 (0.78-1.75) | 0.46 |
|                                |                   |                  |                 |      | Additive      | 1.21 (0.84-1.72) | 0.31 |

ACS, Acute coronary syndrome; MAF, Minor allele frequency; OR, odds ratio; CI, confidence interval; pC, *p*-value. The *p*-values were calculated by the logistic regression analysis, and ORs were adjusted for gender, age, blood pressure, BMI, total cholesterol, HDL-C, LDL-C, triglycerides, and smoking habit.

Supplementary Table S2. Distribution of Ser290Asn and Thr715Pro *SEL-P* polymorphisms in individuals with and without hypertension.

| n (genotype frequencies)              |                          |                         |                        | MAF  | Model         | OR (95%CI)       | pC   |
|---------------------------------------|--------------------------|-------------------------|------------------------|------|---------------|------------------|------|
| <i>SELP G1057A Ser290Asn</i> (rs6131) |                          |                         |                        |      |               |                  |      |
| With hypertension (n=554)             | <i>GG</i><br>483 (0.872) | <i>GA</i><br>68 (0.123) | <i>AA</i><br>3 (0.005) | 0.07 | Co-dominant   | 0.77 (0.55-1.07) | 0.25 |
|                                       |                          |                         |                        |      | Dominant      | 0.76 (0.55-1.06) | 0.10 |
|                                       |                          |                         |                        |      | Recessive     | 0.65 (0.16-2.60) | 0.53 |
| Without hypertension (n=755)          | 627 (0.830)              | 121 (0.160)             | 7 (0.009)              | 0.09 | Over-dominant | 0.78 (0.56-1.08) | 0.13 |
|                                       |                          |                         |                        |      | Additive      | 0.78 (0.57-1.05) | 0.19 |
| <i>SELP A2331C Thr715Pro</i> (rs6136) |                          |                         |                        |      |               |                  |      |
| With hypertension (n=545)             | <i>AA</i><br>480 (0.881) | <i>AC</i><br>63 (0.116) | <i>CC</i><br>2 (0.004) | 0.06 | Co-dominant   | 0.80 (0.56-1.14) | 0.13 |
|                                       |                          |                         |                        |      | Dominant      | 0.76 (0.54-1.07) | 0.12 |
|                                       |                          |                         |                        |      | Recessive     | 0.32 (0.07-1.54) | 0.12 |
| Without hypertension (n=748)          | 638 (0.853)              | 101 (0.135)             | 9 (0.012)              | 0.08 | Over-dominant | 0.81 (0.57-1.15) | 0.23 |
|                                       |                          |                         |                        |      | Additive      | 0.75 (0.55-1.3)  | 0.14 |

ACS, Acute coronary syndrome; MAF, Minor allele frequency; OR, odds ratio; CI, confidence interval; pC, *p*-value. The *p*-values were calculated by the logistic regression analysis, and ORs were adjusted for gender, age, BMI, total cholesterol, HDL-C, LDL-C, triglycerides, and smoking habit.
